# Supplementary material for: Recognition of Porphyromonas gingivalis Gingipain Epitopes by Natural IgM Binding to Malondialdehyde Modified Low-Density Lipoprotein
Source: PLOS journal article supplement (doi:10.1371/journal.pone.0034910), 2012-04-05

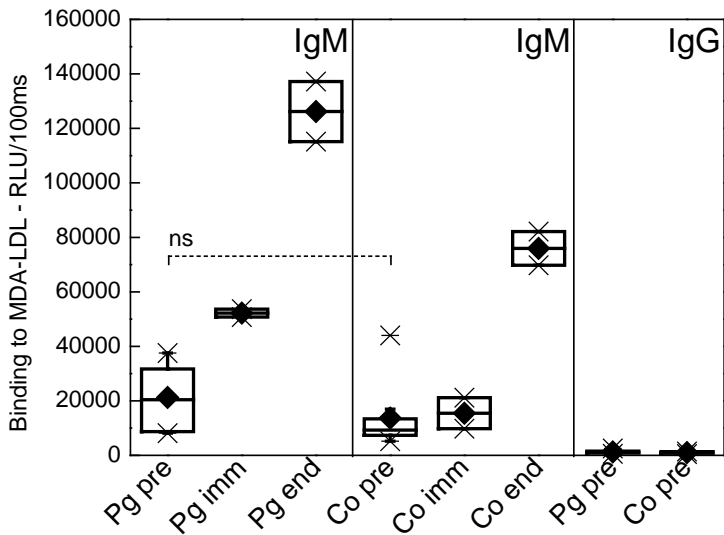

Supplement: S5 (10.1371/journal.pone.0034910.s005) [file journal.pone.0034910.s005]
